1  
2  
3  
4  
5  
6  
7  
8  
9  
10  
11  
12  
13  
14  
15  
16  
17  
18  
19  
20  
21  
22  
23

## **Structural basis for substrate binding and specificity of a sodium/alanine symporter AgcS**

Jinming Ma<sup>1</sup>, Hsiang-Ting Lei<sup>1</sup>, Francis E. Reyes<sup>1</sup>, Silvia Sanchez-Martinez<sup>1</sup>,  
Maen Sarhan<sup>1</sup> and Tamir Gonen<sup>1,2,3§</sup>

<sup>1</sup> Janelia Research Campus, Howard Hughes Medical Institute, 19700 Helix Drive Ashburn VA USA.

<sup>2</sup> Howard Hughes Medical Institute, University of California, Los Angeles, Los Angeles CA 90095 USA.

<sup>3</sup> Departments of Physiology and Biological Chemistry, David Geffen School of Medicine, University of California, Los Angeles, Los Angeles CA 90095 USA.

<sup>§</sup> Correspondence should be addressed to T.G. ([tgonen@ucla.edu](mailto:tgonen@ucla.edu))

## 24 **Abstract**

25 The amino acid, polyamine, and organocation (APC) superfamily is the second largest superfamily of  
26 membrane proteins forming secondary transporters that move a range of organic molecules across the  
27 cell membrane. Each transporter in APC superfamily is specific for a unique sub-set of substrates, even  
28 if they possess a similar structural fold. The mechanism of substrate selectivity remains, by and large,  
29 elusive. Here we report two crystal structures of an APC member from *Methanococcus maripaludis*,  
30 the alanine or glycine:cation symporter (AgcS), with L- or D- alanine bound. Structural analysis  
31 combined with site-directed mutagenesis and functional studies inform on substrate binding, specificity,  
32 and modulation of the AgcS family and reveal key structural features that allow this transporter to  
33 accommodate glycine and alanine while excluding all other amino acids. Mutation of key residues in  
34 the substrate binding site expand the selectivity to include valine and leucine. Moreover, as a transporter  
35 that binds both enantiomers of alanine, the present structures provide an unprecedented opportunity to  
36 gain insights into the mechanism of stereo-selectivity in APC transporters.

37

## 38 **Introduction**

39 Controlling nutrient balance in cells and by extension entire organisms is critical. Bacteria and archaea  
40 evolved sophisticated mechanisms to adapt to life in the most extreme environments. One such example  
41 is *Methanococcus maripaludis* that exists in salt-marsh plains(1) and has the unusual ability to use both  
42 L- and D-alanine as an important nitrogen source to support life in high salt and anaerobic conditions(2–  
43 4). As a transporter that uptakes both enantiomers of alanine, the alanine or glycine:cation symporter  
44 (AgcS) from *Methanococcus maripaludis* plays essential role in this process(3). Furthermore, though  
45 L-amino acids are the dominant substrate in all kingdoms of life, it is now clear that the uptake system  
46 of D-amino acids also fulfill essential functions in many organisms. Several recent studies show that  
47 the uptake system of D-amino acids in bacteria and archaea are crucial for stationary phase cell wall  
48 remodeling(5), host metabolism and virulence(6) although the mechanism by which such amino acids  
49 are transported into cells is poorly understood.

50 The Amino acid-Polyamine-organoCation (APC) superfamily [Transporter Classification DataBase  
51 (TCDB)](7) represents the second largest family of secondary carriers currently known(8–11) and plays  
52 essential roles in a wide spectrum of physiological processes, transporting a large range of substrates  
53 across the membrane. Members of this superfamily have since been identified and expanded to 18  
54 different families in diverse organisms(12). Recent structures have shown that APC superfamily  
55 members contain 10-14 transmembrane helices and exhibit sufficiently similar folds characterized by 5  
56 or 7 transmembrane helix inverted-topology repeat motif(13). However, some of these proteins have  
57 exceptionally broad selectivity, others are restricted to just one or a few amino acids or related  
58 derivatives. It is of much interest to investigate structural basis for substrate binding and specificity of  
59 APC superfamily.

60

61 The alanine or glycine:cation symporter (AgcS) family (TC# 2.A.25) belongs to the APC superfamily  
62 and shows limited sequence similarities with other members. In contrast to ApcT and LeuT of which  
63 substrate specificity are broader(14, 15), members of the AgcS family have been reported to act as  
64 symporters, transporting L- or D- alanine or glycine with Na<sup>+</sup> and/or H<sup>+</sup> but no other amino acids (3,  
65 16–20). Here, we present the crystal structure of AgcS from *Methanococcus maripaludis* in complex  
66 with L- or D- alanine as the first model for members in the AgcS family. The structure of AgcS was  
67 captured in a fully occluded conformation with the transmembrane architecture like other APC  
68 superfamily members. Functional assays demonstrate that purified AgcS binds only glycine and both  
69 enantiomers of alanine, while strictly excluding other amino acids. Further structural analyses combined  
70 with mutagenesis and biochemical studies suggest that the residues at the intracellular face of the  
71 binding pocket play a key role in substrate binding and specificity. Mutation of residues at the binding  
72 site of AgcS can expand its selectivity. Moreover, structural comparisons of AgcS with LeuT, which  
73 can only transport L-amino acids, also pave the way for a better understanding of stereo-selectivity  
74 adopted by the APC superfamily transporters.

75

## 76 **Results**

### 77 **Overall architecture of AgcS**

78 A *Methanococcus maripaludis* AgcS was expressed in *E. coli* and purified in various detergents for  
79 crystallization. Although successfully crystallized, AgcS alone produced only crystals diffracting  
80 anisotropically. The diffraction quality was poor and could not be improved despite major effort. Fab  
81 fragments were therefore generated and applied to co-crystallization with AgcS to improve crystal  
82 contacts (Supplementary Fig. 1a). Crystals of AgcS in a complex with 7B4 Fab fragment diffracted  
83 to ~3.2 Å. The phases obtained by a combination of molecular replacement, using a generic Fab  
84 structure, and experimental phasing from Se-Met labeled AgcS were of high quality, allowing us to  
85 unambiguously discern two AgcS molecules and two Fab fragments in one asymmetric unit  
86 (Supplementary Fig. 1b). In total, two structures of AgcS, one with L-alanine bound and the other with  
87 D-alanine bound, were determined (Supplementary Table 1).

88 AgcS forms a roughly cylindrical shape, which is ~40 Å tall and ~35 Å in diameter comprising 11  
89 transmembrane (TM) helices connected by short cytoplasmic or periplasmic loops (Fig. 1,  
90 Supplementary Fig. 2a). Its N-terminus is at the periplasm while its C-terminus is cytoplasmic. AgcS  
91 appears to maintain pseudo 2-fold symmetry even though it contains an uneven number of TMs (Fig  
92 1a, Supplementary Fig. 2b). One half contains TMs 2,3,7,6 and 8 while the second half contains TMs  
93 4,5,9,10 and 11. TM1 resides outside of the helical bundle and does not seem to participate in  
94 translocation of substrates. The TMs vary greatly in their length and angle with relation to the plane of

95 the membrane: some helices such as TM3 and TM9 appear almost perpendicular to the membrane plane  
96 while TMs 1 and 11 are heavily tilted. TMs 1, 3, 5, 6, 8, 10 and 11 surround the functional core of AgcS,  
97 which is made of TMs 2, 4, 7 and 9. Despite lack of sequence identity (15.1% to LeuT, 14.3% to ApcT  
98 and 14.8% to AdiC), the overall fold of AgcS is similar to that of LeuT (15, 21–23) from the NSS family.  
99 Superposing the crystal structures of AgcS and LeuT gives an overall root-mean-square deviation  
100 (RMSD) of 4.5 Å. The present structure of AgcS mirrors a common model of the LeuT fold Na<sup>+</sup> and/or  
101 H<sup>+</sup>-coupled symporters(24, 25), including ApcT(14) and AdiC(26–28) of the APC family, BetP(29) of  
102 BCCT family, vSGLT(30, 31) of the SSS family, and Mhp1(32) of NCS1 family.

103 Notably, as with other LeuT-like symporters, two of the functional core helices in AgcS are kinked (Fig.  
104 2 inset). TMs 2 and 7 line the substrate translocation pathway in AgcS and are broken into two segments.  
105 In TM2, Ile 76 and Gly 77 adopt an extended, non-helical conformation, linking segments 2a and 2b.  
106 TM7 contains a longer non-helical region from Glu 276 to Ser 281 connecting segments 7a and 7b. The  
107 residues at these non-helical loops expose carbonyl and amide groups at the center of the membrane  
108 bilayer for hydrogen bonding and ion coordination important for substrate binding and transport.

### 109 **AgcS structure in an occluded state**

110 It is generally accepted that secondary transporters function through an alternate access model(33). The  
111 LeuT-fold transporters naturally alternate among three major conformations during their functional  
112 cycle: outward-open, occluded and inward-open state. In the outward-open state, a hydrophilic tunnel  
113 emerges and connects the substrate binding site located in the center of transmembrane helical bundle  
114 with the periplasm. When in the inward-open state, a hydrophilic tunnel leads from the substrate at the  
115 central binding site to the cytosol. During the occluded state, the substrate binding site is isolated from  
116 either the periplasm or cytoplasm. Within a complete switch cycle, substrates can be transported across  
117 the lipid membrane as the transporter alternates from one conformation to the others.

118 Two structures of AgcS were solved in this study, one with L-alanine and one with D-alanine bound,  
119 both captured in the occluded state (Fig. 2). No solvent accessible tunnels or vestibules were apparent  
120 leading from the substrate binding pocket across the membrane portion of the transporter. Previous  
121 studies reported the structures of LeuT in the open-outward, occluded and open-inward states(22, 23).  
122 Amino acid transporters such as AgcS and LeuT appear to gate through movements of the functional  
123 core helices. In AgcS these are TMs 2 and 7 while in LeuT they are TMs 1 and 6. As discussed above,  
124 these helices are broken (Fig. 2 inset) to allow free movement of the top half of the helices with respect  
125 to the bottom half and this in turn opens the binding pocket either to the outside or the inside of the cell.  
126 The pivot point appears to be at the substrate binding pocket. In the overlay of AgcS with open-outward  
127 LeuT (Fig. 2 left), or the overlay of AgcS with the open-inward LeuT (Fig. 2 right), core helices deviate  
128 by more than 20° or 45°, respectively. No such deviation was observed when occluded LeuT was  
129 overlaid with AgcS (Fig. 2 central). This analysis suggests that AgcS was captured in the occluded state.

130 A system of intricate amino acid interactions forms the extracellular and cytoplasmic gates of AgcS.  
131 The extracellular gate of AgcS consists of residues from TM2, TM4, and TM9 (Fig. 3a). Specifically,  
132 Thr 78 and Ala 73, on the two ends of the unwound region in TM2, expose their  $C\alpha$  nitrogen and  
133 carbonyl oxygen atoms for hydrogen bonding with Gln 170 (TM4) and Thr 366 (TM9). On the  
134 cytoplasmic side of the binding pocket, the main chain carbonyl oxygen atoms of Ala 74 (TM2) and  
135 one of the carboxylate oxygen atoms of Glu 276 (TM7) accept two additional hydrogen bonds from the  
136 indole nitrogen of Trp 370 (TM9), forming a plug-like motif to block the transport funnel. This  
137 hydrogen-bond network fastens TMs 2 and 7 to TMs 4 and 9 and lock the helices core bundle  
138 (Supplementary Fig. 2b) in an occluded state.

### 139 **AgcS substrate binding and ion modulation**

140 In current study, both structures of AgcS reveal a small amphipathic substrate binding cavity defined  
141 by residues from TMs 2, 4, 7 and 8. These residues define two distinct regions in the binding pocket: a  
142 hydrophilic charged region close to the extracellular gate and a hydrophobic region embedded deeply  
143 in the pocket toward the cytoplasmic gate. The hydrophobic pocket is mainly formed by Ile165 (TM4),  
144 Phe 273 (TM7), Thr 366 (TM9) and Trp 370 (TM9) (Fig. 4a).

145 The hydrophilic part of the binding pocket contains both the amino and carboxyl groups of the bound  
146 alanine as well as a bound sodium ion. The amino group of the bound alanine is coordinated by the  
147 main-chain carbonyl oxygens of Ala 74, Thr 75 in TM2, and Ser 274 in TM7, and a side-chain carboxyl  
148 group from Glu 276 in TM7 (Fig. 3b). On the opposite side, the exposed main-chain of Gly 77 and Thr  
149 78, which are in the unwound region of TM2, make contacts with the carboxyl group of alanine by  
150 direct hydrogen bonds, along with side-chain amide of the conserved Gln 170 (TM4) (Supplementary  
151 Fig. 3). This glutamine may also stabilize the irregular structure around the unwound region in TM2 by  
152 interaction between its side-chain carbonyl oxygen to the main-chain amino group of Thr 78 (Fig. 3c).

153 The carboxylic group of the bound alanine is further anchored to Asn 80 (TM2), Ser 274 (TM7) and  
154 Asp 308 (TM8) through the salt-bridge interactions mediated by a single sodium ion (Fig. 3c). These  
155 residues are highly conserved in the AgcS family (Supplementary Fig. 3). The coordination of sodium  
156 ion is provided by the side-chain carbonyl oxygens of Asn 80 and Asp 308 and the hydroxyl oxygen of  
157 Ser 274, further stabilized by main-chain carbonyl oxygen of Ser 274 and Thr 75 (Fig. 3c). To  
158 characterize the role of the conserved residues in sodium ion coordination, we generated a mutant (3A  
159 mutation including N80A, S274A and D308A) and evaluated the impact on substrate uptake using  
160 proteoliposomes. The mutant markedly reduced the uptake ability of L-alanine suggesting that the  
161 sodium ion plays a key role in facilitating substrate binding and uptake (Fig. 3d).

### 162 **Substrate selectivity in AgcS**

163 AgcS shows a high selectivity for small amino acids like glycine and alanine with a dependency on  
164 sodium. We first evaluated AgcS binding affinities to several amino acids using Isothermal titration

165 calorimetry (ITC). While heat exchange was identified for the binding of glycine, and both L- and D-  
166 alanine, other amino acids that were tested did not elicit a response (Supplementary Fig. 4). Uptake  
167 studies using reconstituted proteoliposomes likewise indicated impeccable specificity in AgcS for  
168 glycine, L-alanine and D- alanine in the presence of sodium (Supplementary Fig. 5, Fig. 3d).

169 The crystal structures of AgcS with L-alanine or D-alanine bound indicate that the substrate binding  
170 site is small and able to accommodate only small amino acids while maintaining an environment  
171 favorable to both alanine enantiomers. In contrast to the polar region of the bound alanine (discussed  
172 above), the methyl side chain is surrounded within a hydrophobic pocket mainly formed by the side  
173 chain of Ile 165 in TM4, Phe 273 in TM7, Thr 366 and Trp 370 in TM9 (Fig. 4a and 4b). That  
174 hydrophobic pocket could accommodate both alanine enantiomers equally well. The small size of this  
175 hydrophobic pocket, shaped by the van der Waals surface of these binding pocket residues, ensures that  
176 only glycine or alanine could fit while other amino acids not. In sharp contrast, the substrate binding  
177 pocket in LeuT is much larger (Fig. 4c) consistent with the broader selectivity of LeuT and its ability  
178 to accommodate a large variety of amino acids. In AgcS, the aliphatic side chains of any amino acid  
179 larger than alanine would clash with Ile 165 and Phe 273. Consistent with this postulate, mutation of  
180 I165A and F273A show poor substrate selectivity allowing additional amino acids such as L-valine and  
181 L-leucine to be efficiently transported by the mutated AgcS (Fig. 4d, 4e and 4f). These results indicate  
182 that the small size of the substrate binding pocket in AgcS is a key determinant in substrate selectivity,  
183 a structural feature that may apply to other APC superfamily members.

184 Stereo-selectivity and the unusual ability of AgcS to transport both enantiomers of alanine is of interest.  
185 Most amino acid transporters of the APC superfamily have effective stereo-selectivity and tend to  
186 transport L-type amino acids exclusively, mirroring the fact that L-amino acids are most commonly  
187 used in life while D-amino acids are rarely used. However, AgcS has an unusual ability to transport  
188 both enantiomers of alanine to be used as important nitrogen sources. This alanine utilization plays a  
189 crucial role to support *Methanococcus maripaludis* in harsh environments. As discussed above, the  
190 substrate binding site in AgcS has a cytoplasmic facing hydrophobic surface used to accommodate the  
191 aliphatic part of either L- or D- alanine equally well (Fig. 5a and 5b). In sharp contrast, transporters  
192 such as LeuT, that only allow L-type amino acids to be transported do not have an even distribution of  
193 hydrophobic surface at their substrate binding site. Instead, the cytoplasmic face of their substrate  
194 binding site is amphipathic containing both a hydrophobic patch and a charged polarized patch which  
195 is also spatially constrained (Fig. 5c). This feature ensures that only the L-enantiomers of amino acids  
196 can bind while D-enantiomers are repelled electrostatically.

## 197 **Concluding remarks**

198 The mechanism of substrate binding and selectivity is an essential feature for the APC superfamily  
199 members. Here we described the crystal structure of an alanine transporter AgcS capable of transporting  
200 both L- and D- alanine and discovered that both the size and polarity of the substrate binding pocket

201 are important structural determinants for specificity and stereo-selectivity. The size of the binding  
202 pocket determines what amino acids could fit in the transporter while electrostatics control whether L-  
203 type or D-type amino acids could bind. We showed that a single point mutation in the binding site of  
204 AgcS can broaden the specificity of this transporter to allow uptake of larger amino acids such as valine  
205 and leucine. This study forms the basis for future studies on stereo-selectivity in nature and for the  
206 rational design of new transporters.

207

## 208 **METHODS SUMMARY**

209 AgcS (Gene ID: 2761075) from *Methanococcus maripaludis* and its mutants were overexpressed in E.  
210 coli BL21 (DE3) C43. Fab antibody fragments were generated as described in Methods. The AgcS-Fab  
211 complex was purified in the presence of 0.2% (w/v) n-decyl- $\beta$ -D-maltoside and crystallized in the  
212 following condition, 0.1 M Sodium Citrate pH 5.6, 2.5 M Ammonium Sulfate. Crystals were obtained  
213 in the presence of 50 mM L-alanine and D-alanine. Diffraction data sets of all crystals were collected  
214 at the Advanced Light Source (Beamline 8.2.1 and 5.0.2) and Advanced Photon Source (NE-CAT 24-  
215 ID-C). Data processing and structure determination were performed using the autoPROC, RAPD,  
216 PHENIX and COOT programs. Detailed methods can be found in the supplementary information  
217 section that accompany this manuscript.

218

219

## 220 **Acknowledgements**

221 We thank D. Cawley for development and production of monoclonal antibodies, and staff at the  
222 Berkeley Center for Structural Biology, Advanced Light Source (ALS) and the Northeastern  
223 Collaborative Access Team (NE-CAT), located at the Advanced Photon Source (APS), for assistance  
224 with X-ray data collection. The Berkeley Center for Structural Biology is supported in part by the  
225 National Institutes of Health, National Institute of General Medical Sciences, and the Howard Hughes  
226 Medical Institute. The Advanced Light Source is a Department of Energy Office of Science User  
227 Facility under Contract No. DE-AC02-05CH11231. This work is also based upon research conducted  
228 at the Northeastern Collaborative Access Team beamlines, which are funded by the National Institute  
229 of General Medical Sciences from the National Institutes of Health (P41 GM103403). The Pilatus 6M  
230 detector on 24-ID-C beam line is funded by a NIH-ORIP HEI grant (S10 RR029205). This research  
231 used resources of the Advanced Photon Source, a U.S. Department of Energy (DOE) Office of Science  
232 User Facility operated for the DOE Office of Science by Argonne National Laboratory under Contract  
233 No. DE-AC02-06CH11357. Research in the Gonen laboratory is funded by the Howard Hughes  
234 Medical Institute. Coordinates and structure factors were deposited in the Protein Data Bank.

235

## 236 **Figure Legends**

237 **Figure 1. Overall structure of AgcS.** (a). The topology of AgcS. The position of the bound alanine is  
238 depicted as a yellow triangle. (b). View in the plane of the membrane. Coloring and numbering of  
239 helices (cylinders) are the same as in Fig. 1A.

240

241 **Figure 2. AgcS in the occluded state.** AgcS structure was compared to LeuT open-outward state (left,  
242 PDB: 3tt1, cyans), LeuT occlude state (central, PDB: 2qei, green), and LeuT open-inward state (right,  
243 PDB: 3tt3, orange). Key structural changes are marked with red arrows. A close-up view of the  
244 unwound regions splitting TMs 2 and 7 are shown inset highlighting residues that are involved in  
245 substrate binding.

246

247 **Figure 3. Gating interactions and substrate binding site in AgcS.** (a). A close-up view of gating  
248 interaction network around binding pocket. (b). Hydrogen bonds between the amino group of the  
249 substrate and the residues of AgcS. (c). Hydrogen bonds and ionic interactions in the hydrophilic part  
250 of binding pocket are depicted as dashed lines. Bound Na<sup>+</sup> ion shown as a grey sphere. (d). The relative  
251 uptake ability for missense mutant (three points made up of N80A, S274A, and D308A) compared with  
252 that of the WT protein.

253 **Figure 4. Substrate selectivity in AgcS dictated by the size of the binding pocket.** Comparison of  
254 the hydrophobic pocket of alanine-bound AgcS and LeuT (PDB: 2qei). (a-c) Van derWaals surfaces for  
255 alanine side chain and interacting residues are shown as colored spheres. The binding pocket of AgcS  
256 is very small and only glycine or alanine can fit while in LeuT where substrate selectivity is broader the  
257 site is much larger able to accommodate larger amino acids (d-f) AgcS mutants I165A and F273A lose  
258 substrate selectivity allowing valine and leucine to be transported.

259 **Figure 5. Electrostatics in the binding pocket of AgcS dictate stereoselectivity.** Stereo-selectivity is  
260 afforded by electrostatic repulsion. The amide plane of substrate is shown as gray dash. In AgcS both  
261 alanine enantiomers fit equally well as the two faces of the binding pocket are hydrophobic. In LeuT,  
262 which only binds L-amino acids, one face is hydrophobic while the other is charged ensuring selection  
263 for L-amino acids over D-amino acids.

## 264 **References**

- 265 1. Jones WJ, Paynter MJB, Gupta R (1983) Characterization of *Methanococcus maripaludis* sp.  
266 nov., a new methanogen isolated from salt marsh sediment. *Arch Microbiol* 135(2):91–97.
- 267 2. Lie TJ, Leigh JA (2002) Regulatory response of *Methanococcus maripaludis* to alanine, an



- 268 intermediate nitrogen source. *J Bacteriol* 184(19):5301–5306.
- 269 3. Moore BC, Leigh JA (2005) Markerless mutagenesis in *Methanococcus maripaludis*  
270 demonstrates roles for alanine dehydrogenase, alanine racemase, and alanine permease. *J*  
271 *Bacteriol* 187(3):972–979.
- 272 4. Goyal N, Zhou Z, Karimi IA (2016) Metabolic processes of *Methanococcus maripaludis* and  
273 potential applications. *Microb Cell Fact* 15(1):107.
- 274 5. Lam H, et al. (2009) D-amino acids govern stationary phase cell wall remodeling in bacteria.  
275 *Science (80- )* 325(5947):1552–1555.
- 276 6. Connolly JP, et al. (2016) A Highly Conserved Bacterial D-Serine Uptake System Links Host  
277 Metabolism and Virulence. *PLoS Pathog* 12(1):e1005359.
- 278 7. Saier MH, et al. (2016) The Transporter Classification Database (TCDB): Recent advances.  
279 *Nucleic Acids Res* 44(D1):D372–D379.
- 280 8. Jack DL, Paulsen IT, Saier MH (2000) The amino acid/polyamine/organocation (APC)  
281 superfamily of transporters specific for amino acids, polyamines and organocations.  
282 *Microbiology* 146 ( Pt 8:1797–1814.
- 283 9. Wong FH, et al. (2012) The amino acid-polyamine-organocation superfamily. *J Mol Microbiol*  
284 *Biotechnol* 22(2):105–113.
- 285 10. Hoglund PJ, Nordstrom KJ V., Schioth HB, Fredriksson R (2011) The Solute Carrier Families  
286 Have a Remarkably Long Evolutionary History with the Majority of the Human Families Present  
287 before Divergence of Bilaterian Species. *Mol Biol Evol* 28(4):1531–1541.
- 288 11. Perland E, Fredriksson R (2017) Classification Systems of Secondary Active Transporters.  
289 *Trends Pharmacol Sci* 38(3):305–315.
- 290 12. Vastermark A, Wollwage S, Houle ME, Rio R, Saier Jr. MH (2014) Expansion of the APC  
291 superfamily of secondary carriers. *Proteins* 82(10):2797–2811.
- 292 13. Västermark Å, Saier MH (2014) Evolutionary relationship between 5+5 and 7+7 inverted repeat  
293 folds within the amino acid-polyamine-organocation superfamily. *Proteins Struct Funct*  
294 *Bioinforma* 82(2):336–346.
- 295 14. Shaffer PL, Goehring A, Shankaranarayanan A, Gouaux E (2009) Structure and mechanism of  
296 a Na<sup>+</sup>-independent amino acid transporter. *Science (80- )* 325(5943):1010–1014.
- 297 15. Singh SK, Piscitelli CL, Yamashita A, Gouaux E (2008) A competitive inhibitor traps LeuT in  
298 an open-to-out conformation. *Science (80- )* 322(5908):1655–1661.
- 299 16. Kamata H, et al. (1992) Primary structure of the alanine carrier protein of thermophilic bacterium  
300 PS3. *J Biol Chem* 267(30):21650–21655.
- 301 17. Rodionov DA, et al. (2011) Comparative genomic reconstruction of transcriptional networks  
302 controlling central metabolism in the *Shewanella* genus. *BMC Genomics* 12 Suppl 1:S3.

- 303 18. Yoshida K, et al. (2003) Identification of additional TnrA-regulated genes of *Bacillus subtilis*  
304 associated with a TnrA box. *Mol Microbiol* 49(1):157–165.
- 305 19. Bualuang A, Kageyama H, Tanaka Y, Incharoensakdi A, Takabe T (2015) Functional  
306 characterization of a member of alanine or glycine: cation symporter family in halotolerant  
307 cyanobacterium *Aphanothece halophytica*. *Biosci Biotechnol Biochem* 79(2):230–235.
- 308 20. Kanamori M, Kamata H, Yagisawa H, Hirata H (1999) Overexpression of the alanine carrier  
309 protein gene from thermophilic bacterium PS3 in *Escherichia coli*. *J Biochem* 125(3):454–459.
- 310 21. Yamashita A, Singh SK, Kawate T, Jin Y, Gouaux E (2005) Crystal structure of a bacterial  
311 homologue of Na<sup>+</sup>/Cl<sup>-</sup>-dependent neurotransmitter transporters. *Nature* 437(7056):215–223.
- 312 22. Singh SK, Yamashita A, Gouaux E (2007) Antidepressant binding site in a bacterial homologue  
313 of neurotransmitter transporters. *Nature* 448(7156):952–956.
- 314 23. Krishnamurthy H, Gouaux E (2012) X-ray structures of LeuT in substrate-free outward-open  
315 and apo inward-open states. *Nature* 481(7382):469–474.
- 316 24. Krishnamurthy H, Piscitelli CL, Gouaux E (2009) Unlocking the molecular secrets of sodium-  
317 coupled transporters. *Nature* 459(7245):347–355.
- 318 25. Shi Y (2013) Common Folds and Transport Mechanisms of Secondary Active Transporters.  
319 *Annu Rev Biophys* 42(1):51–72.
- 320 26. Fang Y, et al. (2009) Structure of a prokaryotic virtual proton pump at 3.2 Å resolution. *Nature*  
321 460(7258):1040–1043.
- 322 27. Gao X, et al. (2009) Structure and mechanism of an amino acid antiporter. *Science (80- )*  
323 324(5934):1565–1568.
- 324 28. Gao X, et al. (2010) Mechanism of substrate recognition and transport by an amino acid  
325 antiporter. *Nature* 463(7282):828–832.
- 326 29. Ressler S, Terwisscha van Scheltinga AC, Vorrhein C, Ott V, Ziegler C (2009) Molecular basis  
327 of transport and regulation in the Na<sup>(+)</sup>/betaine symporter BetP. *Nature* 458(7234):47–52.
- 328 30. Faham S, et al. (2008) The crystal structure of a sodium galactose transporter reveals mechanistic  
329 insights into Na<sup>+</sup>/sugar symport. *Science (80- )* 321(5890):810–814.
- 330 31. Watanabe A, et al. (2010) The mechanism of sodium and substrate release from the binding  
331 pocket of vSGLT. *Nature* 468(7326):988–991.
- 332 32. Weyand S, et al. (2008) Structure and molecular mechanism of a nucleobase-cation-symport-1  
333 family transporter. *Science (80- )* 322(5902):709–713.
- 334 33. Drew D, Boudker O (2016) Shared Molecular Mechanisms of Membrane Transporters. *Annu*  
335 *Rev Biochem* 85(1):543–572.

336

Fig. 1

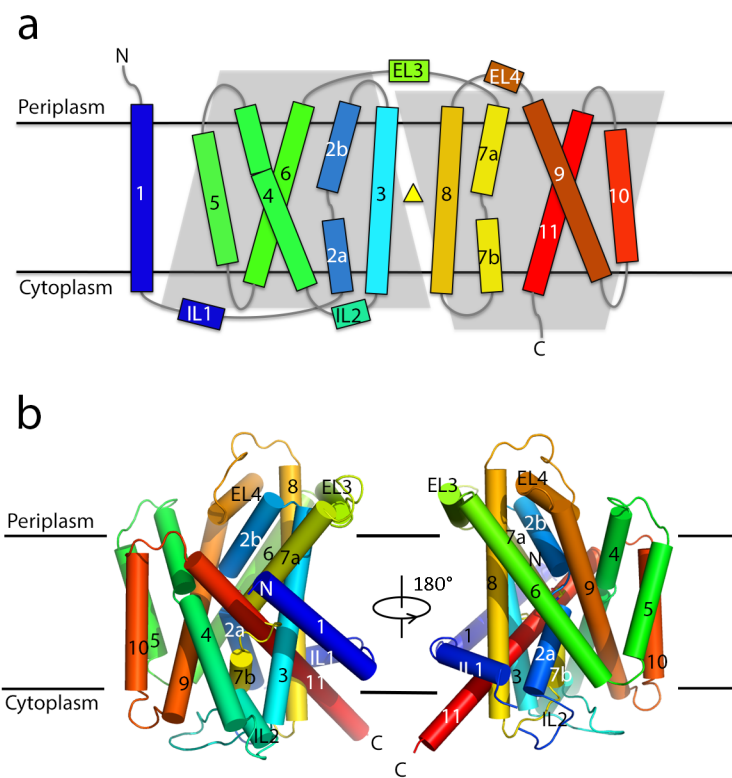

Fig. 2

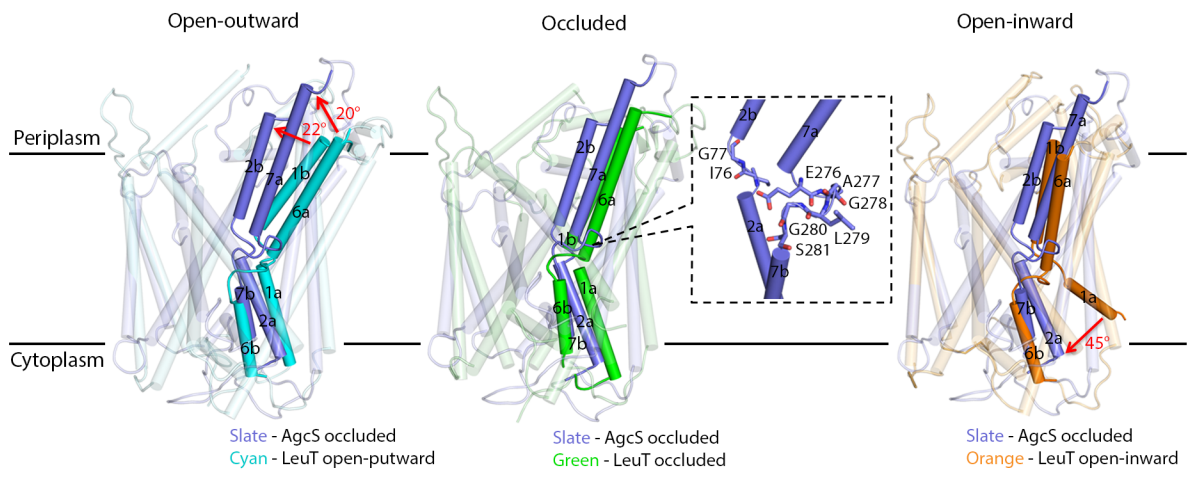

Fig. 3

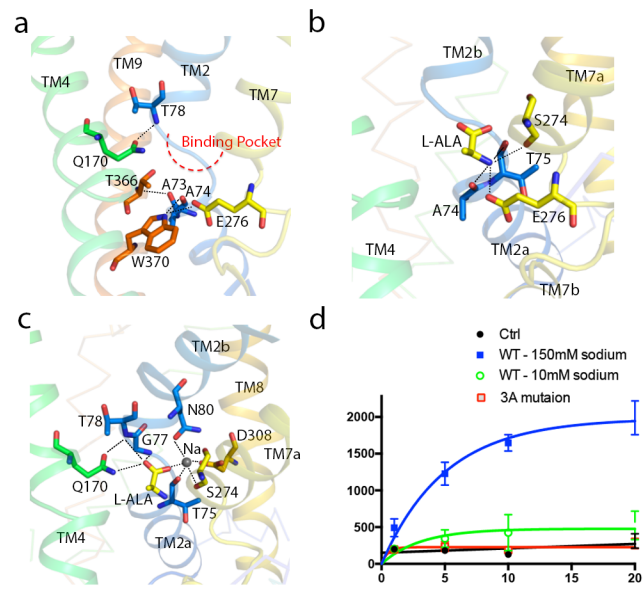

Fig. 4

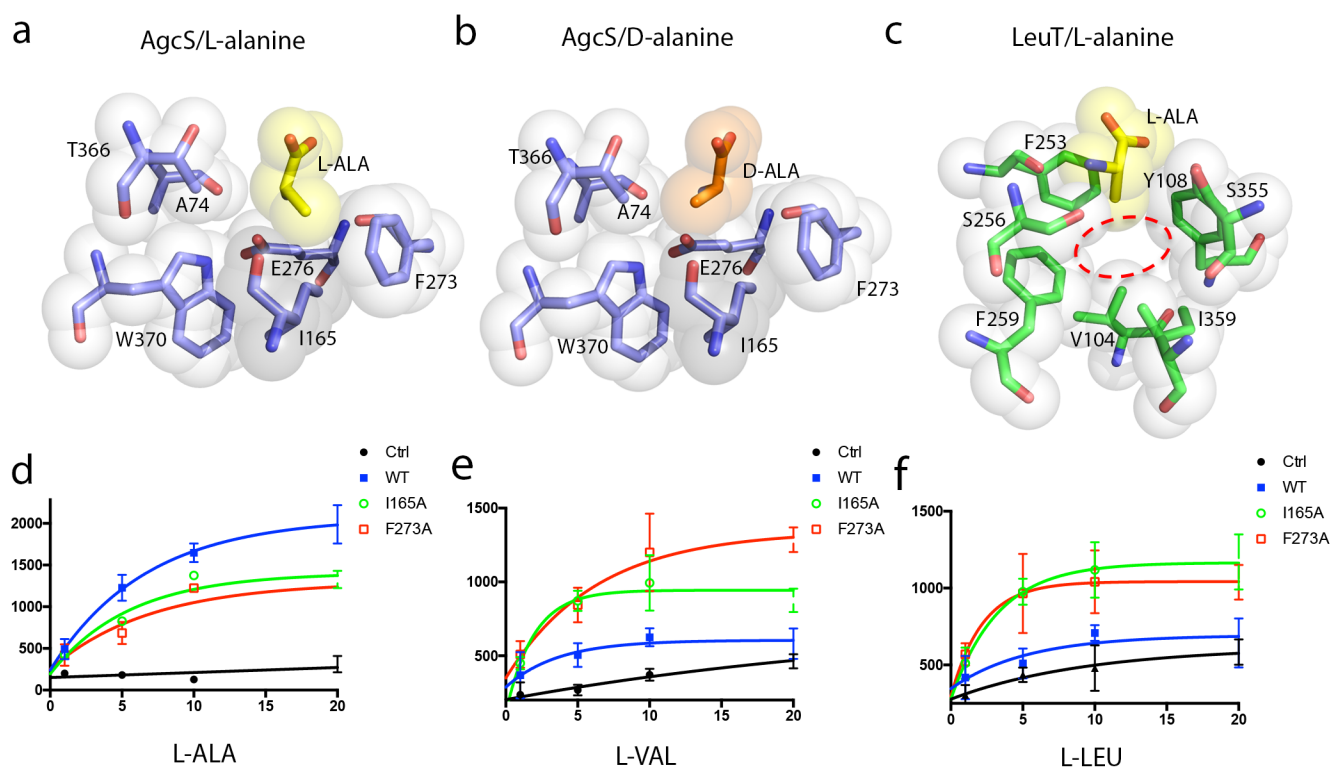

Fig. 5

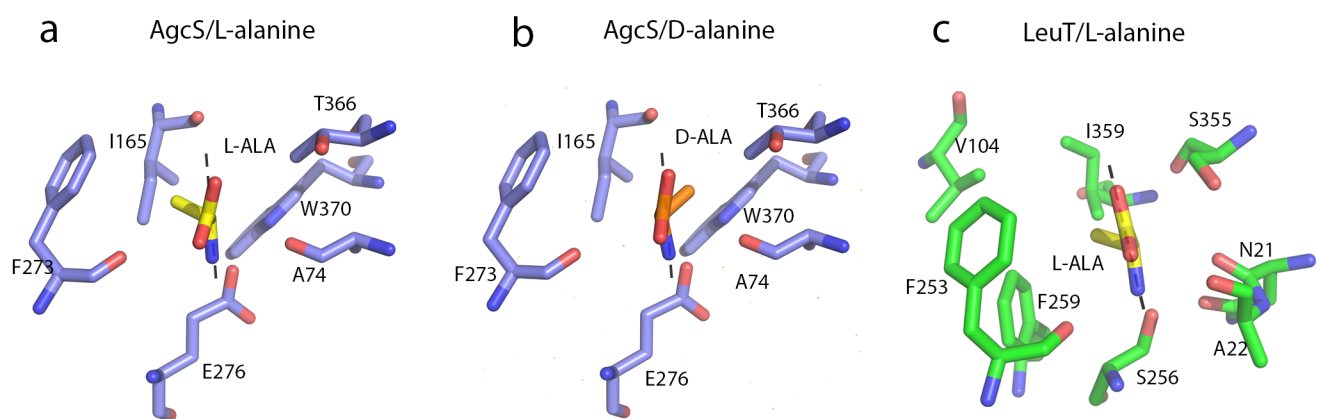

Source: https://www.biorxiv.org/content/10.1101/293811v1.full.pdf
